# Supplementary material
Source: publisher figshare collection journal article supplement (https://acs.figshare.com/ndownloader/files/6865191)
Supplement: Supplementary file 1 [file 6865191]

Compound_ID,SMILES
T2384,ClC1=C(S(NC2=CC(Cl)=C(SC3=NC4=C(C=CC(Cl)=C4)S3)C=C2)(=O)=O)C=CC(C(F)(F)F)=C1
MRL20,O=C(C1=CC=C(OC)C=C1)N(C(C)=C2CC3=CC=CC=C3O[C@@H](C)C(O)=O)C4=C2C=C(OC(F)(F)F)C=C4
GW9662,ClC(C=CC([N+]([O-])=O)=C1)=C1C(NC2=CC=CC=C2)=O
